# Supplementary material
Source: PubMed Central journal article supplement (PMC5797958)
Supplement: EMBR-19-337-s001.pdf [file EMBR-19-337-s001.pdf]

## Appendix.

### Appendix Table S1.

#### a. RT-qPCR primers

|            |                        |
|------------|------------------------|
| GAPDH-F    | CTCCTGCACCACCAACTGCT   |
| GAPDH-R    | GGGCCATCCACAGTCTTCTG   |
| CTGF-F     | AGGAGTGGGTGTGTGACGA    |
| CTGF-R     | CCAGGCAGTTGGCTCTAATC   |
| Cyr61-F    | GAGTGGGTCTGTGACGAGGAT  |
| Cyr61-R    | GGTTGTATAGGATGCGAGGCT  |
| TRIP6-F    | CCTTCACAGTGGATGCTACG   |
| TRIP6-R    | CTTGGGGCAAACCTTCCTGT   |
| vinculin-F | TCAGATGAGGTGACTCGGTTGG |
| vinculin-R | GGGTGCTTATGGTTGGGATTGG |

#### b. TRIP6 CRISPR primers (designed using <http://crispr.mit.edu/>)

|         |                         |
|---------|-------------------------|
| Oligo 1 | CACCGGCGATCCCCGCGGCACCC |
| Oligo 2 | AAACGGGTGCCGCGGGGATCGCC |

### Appendix Table S2. Reagent and resource table

| REAGENT or RESOURCE          | SOURCE         | IDENTIFIER                               |
|------------------------------|----------------|------------------------------------------|
| Antibodies                   |                |                                          |
| Mouse TRIP6                  | Santa Cruz     | Cat# sc-365122                           |
| Rabbit YAP                   | Santa Cruz     | Cat# sc-15407                            |
| Mouse YAP                    | Santa Cruz     | Cat# sc-101199                           |
| Mouse GFP                    | Santa Cruz     | Cat# sc-9996                             |
| Mouse Myc                    | Santa Cruz     | Cat# sc-40                               |
| Rabbit Myc                   | Santa Cruz     | Cat# sc-789                              |
| Rabbit LATS1                 | Cell Signaling | Cat# 3477S                               |
| Rabbit LATS2                 | Cell Signaling | Cat# 5888S                               |
| Rabbit phospho LATS Ser 909  | Cell Signaling | Cat# 9157S                               |
| Rabbit phospho LATS Thr 1079 | Cell Signaling | Cat# 8654S                               |
| Rabbit phospho MST           | Cell Signaling | Cat# 3681S                               |
| Rabbit MOB1                  | Cell Signaling | Cat# 13730S                              |
| Rabbit phospho YAP Ser 127   | Cell Signaling | Cat# 4911S                               |
| Rabbit LATS2                 | Proteintech    | Cat# 20276-1-AP                          |
| Mouse MBP                    | Proteintech    | Cat# 66003-1-Ig                          |
| Rabbit GST                   | Proteintech    | Cat# 10000-0-AP                          |
| Mouse Tubulin                | Proteintech    | Cat# 66031-1-Ig                          |
| Mouse E-cadherin             | BD Biosciences | Cat# 610181                              |
| Mouse FLAG                   | Sigma          | Cat# F1804                               |
| Mouse vinculin               | Sigma          | Cat# V9131, kindly provided by Beth Luna |
| Bacterial and Virus Strains  |                |                                          |

|                                                     |                         |                  |
|-----------------------------------------------------|-------------------------|------------------|
| DH5 $\alpha$ Competent Cells                        | Thermo Fisher           | Cat# 18265017    |
| Rosetta™(DE3) Competent Cells - Novagen             | EMD Millipore           | Cat# 70954       |
| Chemicals, Peptides, and Recombinant Proteins       |                         |                  |
| Penicillin-Streptomycin                             | Thermo Fisher           | Cat# 15140-122   |
| Epidermal Growth Factor                             | Peprtech                | Cat# AF-100-15   |
| Hydrocortisone                                      | Sigma                   | Cat# H-0888      |
| Cholera toxin                                       | Sigma                   | Cat# C-8052      |
| Insulin                                             | Sigma                   | Cat# I-1882      |
| Lipofectamine 2000                                  | Thermo Fisher           | Cat# 11668019    |
| RNAiMAX Lipofectamine                               | Thermo Fisher           | Cat# 13778150    |
| FuGENE HD Transfection Reagent                      | Promega                 | Cat# E2311       |
| Protease Inhibitor Cocktail                         | Sigma                   | Cat# P8340       |
| Dynabeads Protein G                                 | Thermo Fisher           | Cat# 10004D      |
| Collagen I                                          | Corning                 | Cat# 354231      |
| Latrunculin B                                       | Sigma                   | Cat# L5288       |
| Blebbistatin                                        | Sigma                   | Cat# B0560       |
| Y27632                                              | Tocris                  | Cat# 1254        |
| Puromycin                                           | Thermo Fisher           | Cat# A1113803    |
| Critical Commercial Assays                          |                         |                  |
| Quick RNA Mini Prep Kit                             | Zymo Research           | Cat# R1054       |
| qScript cDNA super mix                              | Quanta Biosciences      | Cat# 101414-102  |
| KAPA SYBR Fast- Master Mix Universal kit            | Kapa Biosystems         | Cat# KK4651      |
| Qiagen Plasmid Mini Prep Kit                        | Qiagen                  | Cat# 27104       |
| Experimental Models: Cell Lines                     |                         |                  |
| MCF10A                                              | ATCC                    | CRL-10317        |
| HEK 293                                             | ATCC                    | CRL-1573         |
| HEK 293A                                            | Thermo Fisher           | #R70507          |
| HEK 293A TRIP6 CRISPR mediated knockout line        | This study              | N/A              |
| Oligonucleotides                                    |                         |                  |
| control siRNA CGUACGCGGAUACUUCGA                    | GE Lifesciences         | D-001100-01-20   |
| SMARTpool: ON-TARGETplus LATS1 siRNA                | GE Lifesciences         | L-004632-00-0005 |
| SMARTpool: ON-TARGETplus LATS2 siRNA                | GE Lifesciences         | L-003865-00-0005 |
| Vinculin siRNAs, oligo IDs: HSS111260 and HSS187662 | Invitrogen              | Cat# 1299001     |
| RT-qPCR primers, see table S1a                      | N/A                     | N/A              |
| TRIP6 CRISPR primers, see table S1b                 | N/A                     | N/A              |
| Recombinant DNA                                     |                         |                  |
| pDONR221 LATS2                                      | This study              | N/A              |
| pDONR221 TRIP6                                      | This study              | N/A              |
| pDEST-MBP LATS2                                     | This study              | N/A              |
| pDEST-GST TRIP6                                     | This study              | N/A              |
| pET28a MOB1A                                        | This study              | N/A              |
| pcDNA-FLAG-Hu-Trip6                                 | Addgene                 | Addgene #27255   |
| pcDNA-FLAG-Hu-Trip6 1-277                           | This study              | N/A              |
| pcDNA-FLAG-Hu-Trip6 278-476                         | This study              | N/A              |
| pCI113-LAP-GFP-LATS2                                | Paramsivam et al., 2011 | N/A              |

|                                                                       |                                                                     |                                                                                                        |
|-----------------------------------------------------------------------|---------------------------------------------------------------------|--------------------------------------------------------------------------------------------------------|
| pCI113-LAP-GFP-LATS2 137-677                                          | This study                                                          | N/A                                                                                                    |
| pCI113-LAP-GFP-LATS2 668-947                                          | This study                                                          | N/A                                                                                                    |
| pCI113-LAP-GFP-LATS2 376-397                                          | This study                                                          | N/A                                                                                                    |
| pCI113-LAP-GFP-LATS2 376-568                                          | This study                                                          | N/A                                                                                                    |
| pCI113-LAP-GFP-LATS2 604-625                                          | This study                                                          | N/A                                                                                                    |
| pCI113-LAP-GFP-LATS2 625-644                                          | This study                                                          | N/A                                                                                                    |
| pcDNA3.1-Myc-MOB1                                                     | MOB1 was cloned in pcDNA3.1 from pSIRN-HA-MOB1 plasmid.             | pSIRN-HA-MOB1 plasmid DNA was a gift of Thanos Halazonetis (University of Geneva, Geneva, Switzerland) |
| pEGFP Vinculin                                                        | Addgene                                                             | Addgene# 46265                                                                                         |
| pEGFP Vinculin T12                                                    | Addgene                                                             | Addgene# 46266                                                                                         |
| pGEX-4T-1                                                             | GE Lifesciences                                                     | Cat# 28-9545-49                                                                                        |
| TRIP6 shRNA1: GCTGCTTTGTATGTTCTACAT,<br>shRNA4: GAAGCTGGTTCACGACATGAA | shRNA Core Facility (UMASS)                                         | shRNA1:T<br>TRCN0000061438,<br>shRNA4:<br>TRCN0000061441                                               |
| EGFP shRNA-Control                                                    | shRNA Core Facility (UMASS)                                         | N/A                                                                                                    |
| Software and Algorithms                                               |                                                                     |                                                                                                        |
| Image J                                                               | <a href="https://imagej.nih.gov/ij/">https://imagej.nih.gov/ij/</a> | N/A                                                                                                    |
| IPLab Spectrum software                                               | Signal Analytics, Vienna, VA                                        | N/A                                                                                                    |
| Leica Application Suite X                                             | Leica Microsystems                                                  | N/A                                                                                                    |
